# Supplementary material for: Processing by MRE11 is involved in the sensitivity of subtelomeric regions to DNA double-strand breaks
Source: PubMed Central journal article supplement (PMC4652756; doi:10.1093/nar/gkv714), 2015-07-23
Supplement: supp_gkv714_nar-00734-d-2015-File008.pdf [file supp_gkv714_nar-00734-d-2015-File008.pdf]

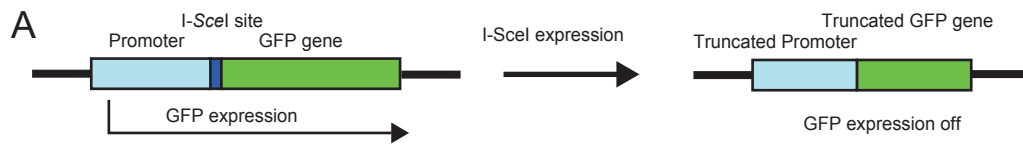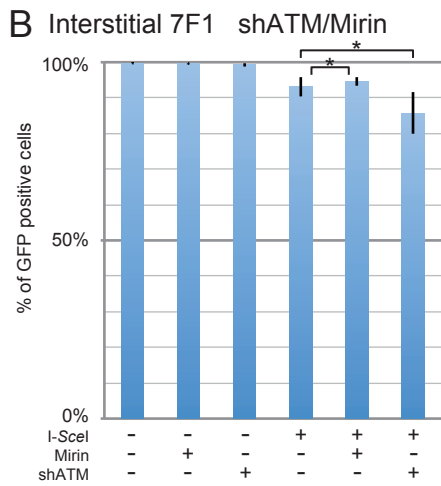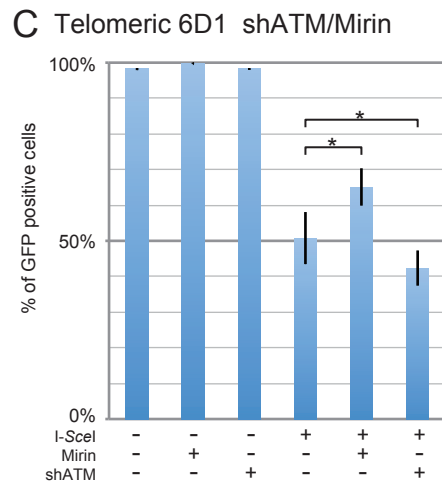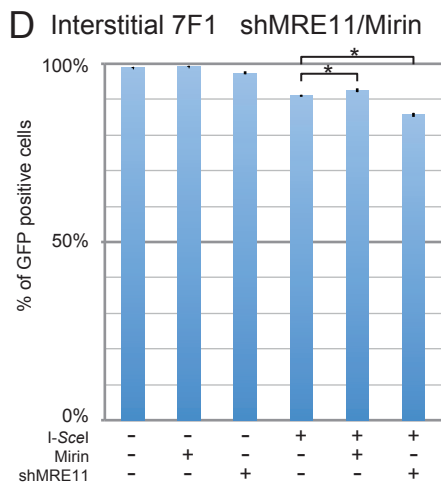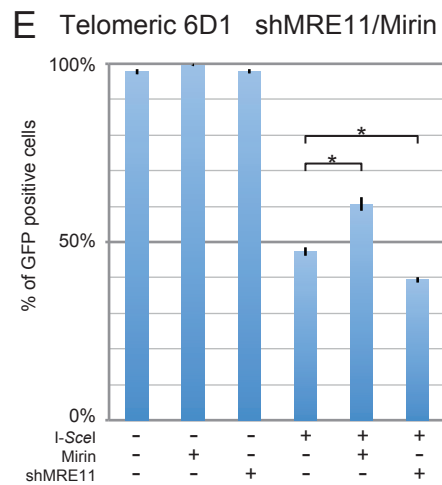

Figure S1

**Figure S1.** The effect of inhibition of MRE11 and ATM on large deletions at interstitial and subtelomeric DSBs. The results are the same as those shown in Figure 1, except that the data is plotted as GFP-positive cells. (A) Cell clones containing the pGFP-ISceI plasmid integrated at an interstitial (GFP-7F1) or telomeric (GFP-6D1) site were used for analysis of large deletions. The GFP gene in the integrated pGFP-ISceI plasmid is inactivated following large deletions of more than 28 bps at the I-SceI-induced DSB. The frequency of large deletions (GFP-negative cells) in clone GFP-7F1 (B, D) and in clone GFP-6D1 (C, E) following infection with the pQCXIH or pQCXIH-ISceI retrovirus vector and selection with hygromycin for 14 days. Large deletions were analyzed following (B, C) treatment with Mirin or knockdown of ATM (shATM), or (D, E) treatment with Mirin or knockdown of MRE11 (shMRE11). Control cultures for knockdown of ATM or MRE11 were treated with shRNA-mediated knockdown of luciferase, while control cultures for Mirin were treated with DMSO. All samples were analyzed in triplicate. Error bars represent the standard deviation from three separate experiments. Statistical significance for comparisons between the indicated values (horizontal lines) was determined using the two-tailed Student's t-Test, and an asterisk indicates statistically significant values of 0.05 or less.

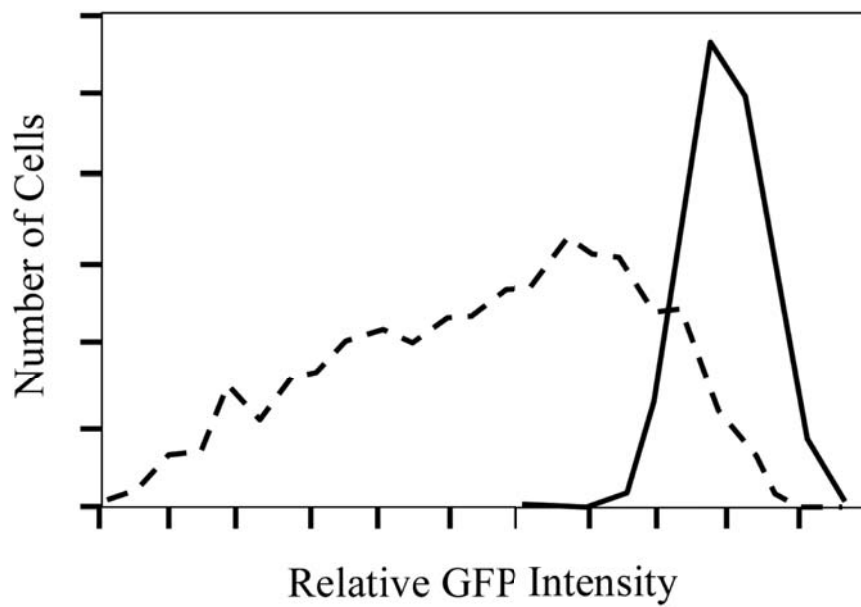

Figure S2

**Figure S2.** Relative expression of GFP in cells with interstitial and telomeric integration sites. The relative level of expression of GFP in clone GFP-7F1 (solid line) with an interstitial integration site is high and uniform in different cells in the population. In contrast, the level of expression of the GFP gene in clone GFP-6D1 (dashed line) with a telomeric integration site is lower and heterogeneous in different cells in the population, although almost all cells show detectable levels of expression. The distribution of the level of GFP expression was determined using a Cellometer (Nexcelcom).

Interstitial 7F2 shATM/Mirin

Exp. #1

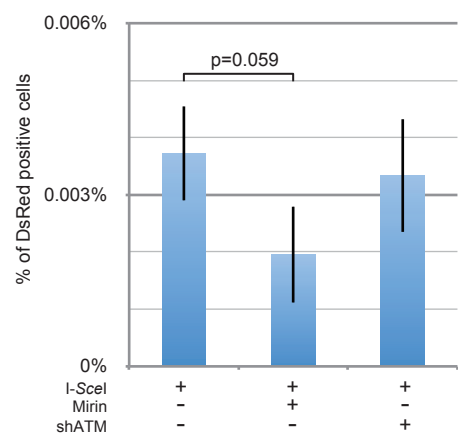

Exp. #2

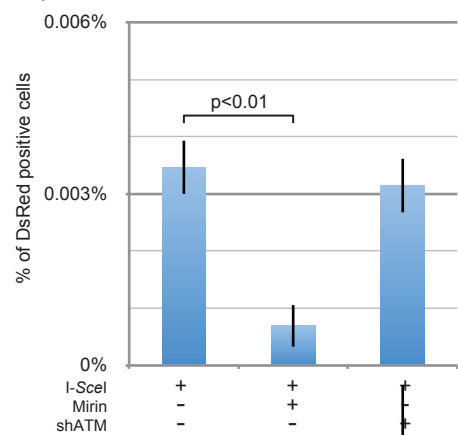

Exp. #3

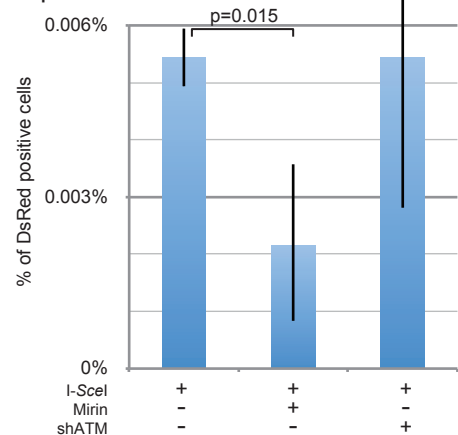

Exp. #4

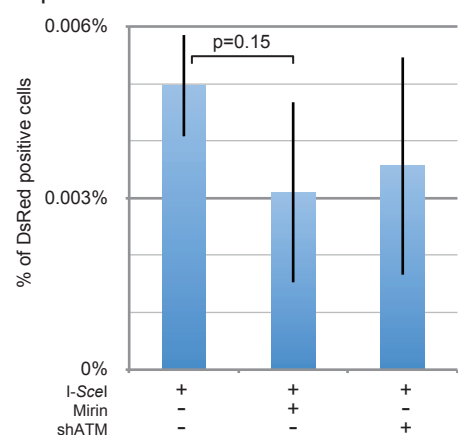

Telomeric 6J8 shATM/Mirin

Exp. #1

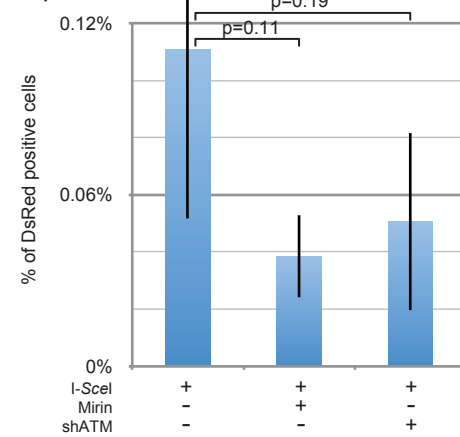

Exp. #2

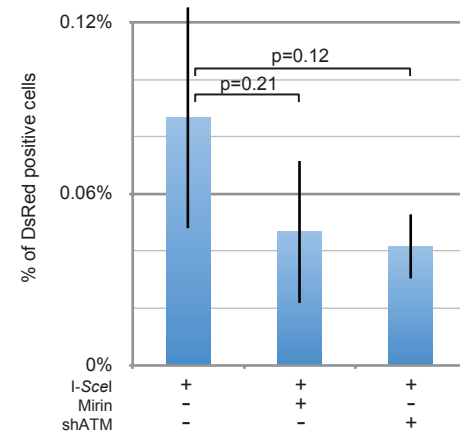

Exp. #3

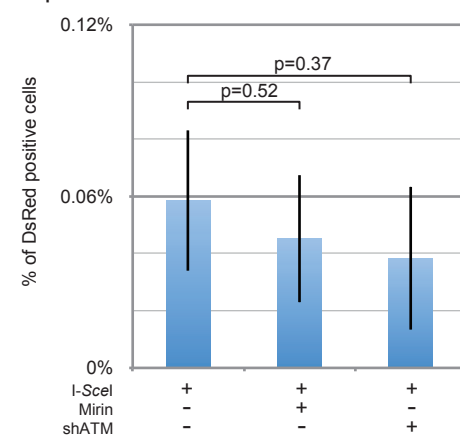

Exp. #4

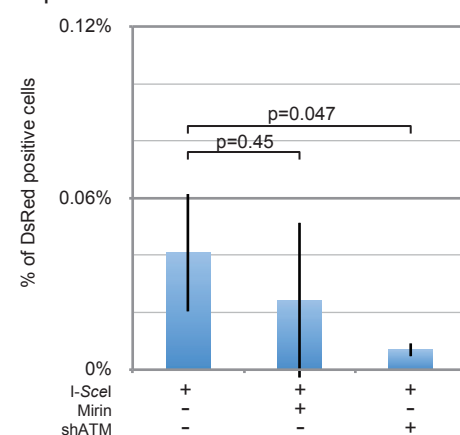

Exp. #5

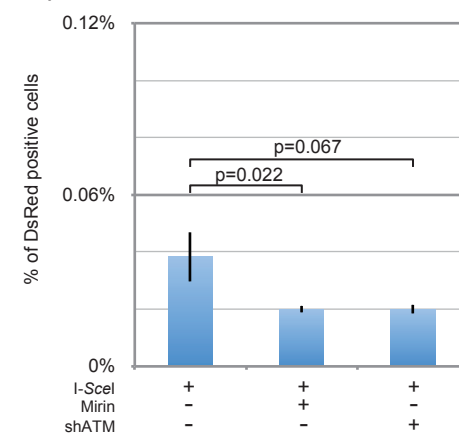

Figure S3

**Figure S3.** The individual experiments conducted to determine the effects of inhibition Mirin and knockdown of ATM on GCRs in clones EDS-7F2 and EDS-6J8. The frequency of GCRs at the I-SceI-induced DSB was determined following infection with the pQCXIH-ISceI retrovirus vector and selection with hygromycin in four experiments with EDS-7F2 (Exp. #1-4) and five experiments with EDS-6J8 (Exp. #1-5), each done in triplicate. GCRs were analyzed following treatment with Mirin or knockdown of ATM (shATM). Control cultures for knockdown of ATM were treated with shRNA-mediated knockdown of luciferase, while control cultures for Mirin were treated with DMSO. The values shown in the graph represent the average of more than three independent experiments, each done in triplicate (see Table S1 for raw data). Error bars represent the standard deviation of the triplicate samples. Statistical significance for comparisons between the indicated values (horizontal lines) was determined using the two-tailed Student's t-Test, and an asterisk indicates statistically significant values of 0.05 or less.

Interstitial 7F2 shMRE11/Mirin

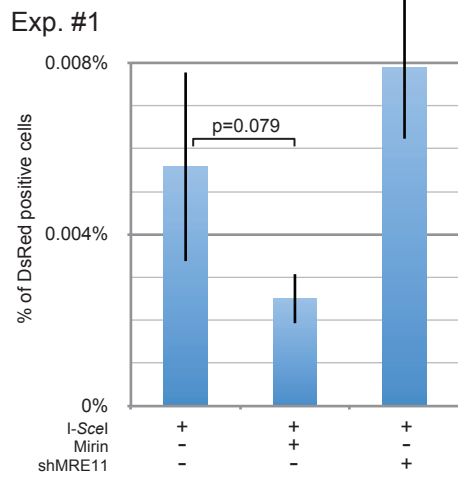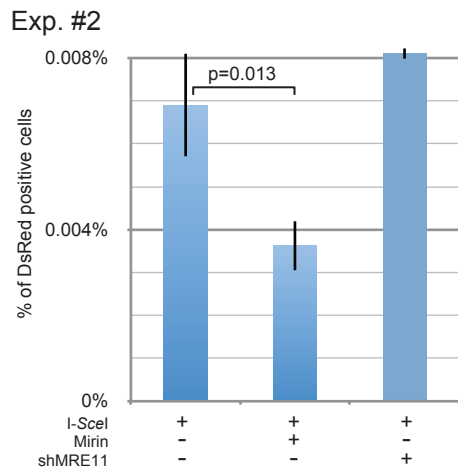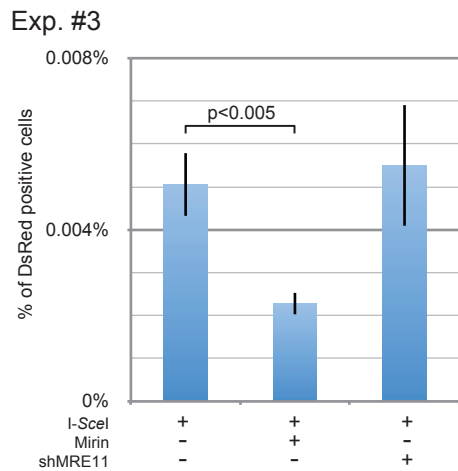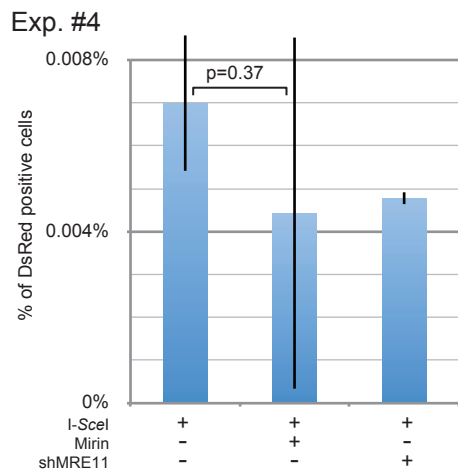

Telomeric 6J8 shMRE11/Mirin

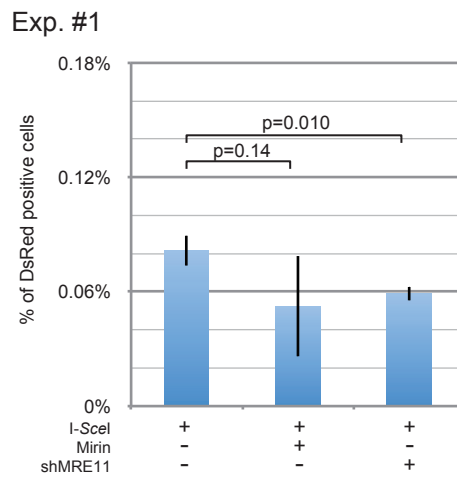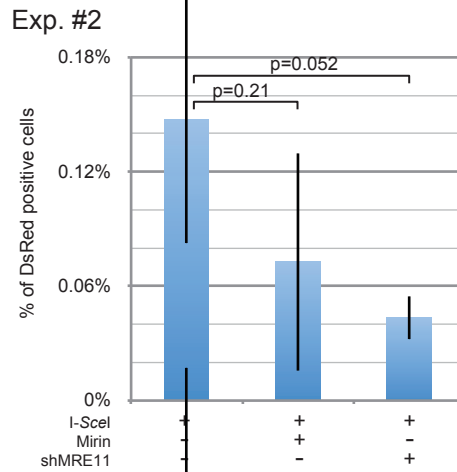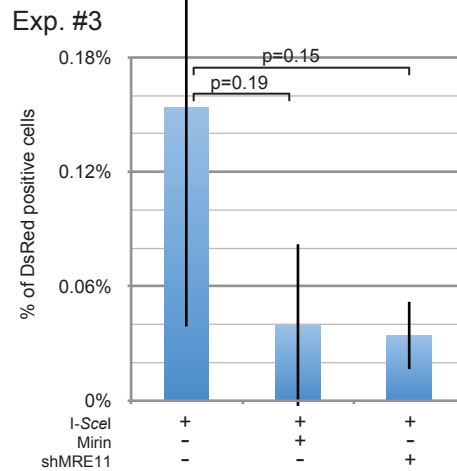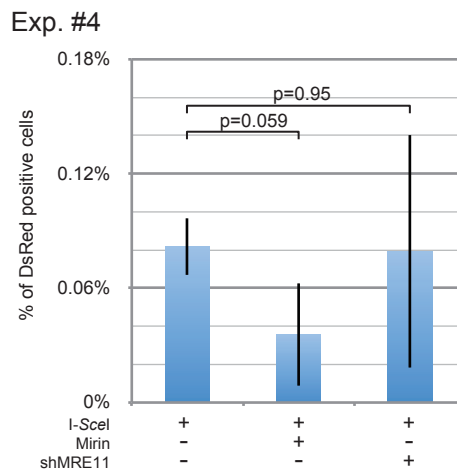

Figure S4

**Figure S4.** The individual experiments conducted to determine the effects of inhibition Mirin and knockdown of MRE11 on GCRs in clones EDS-7F2 and EDS-6J8. The frequency of GCRs at the *I-SceI*-induced DSB was determined following infection with the pQCXIH-*I-SceI* retrovirus vector and selection with hygromycin in four experiments with EDS-7F2 (Exp. #1-4) and four experiments with EDS-6J8 (Exp. #1-4), each done in triplicate. GCRs were analyzed following treatment with Mirin or knockdown of MRE11 (shMRE11). Control cultures for knockdown of MRE11 were treated with shRNA-mediated knockdown of luciferase, while control cultures for Mirin were treated with DMSO. The values shown in the graph represent the average of more than three independent experiments, each done in triplicate (see Table S1 for raw data). Error bars represent the standard deviation of the triplicate samples. Statistical significance for comparisons between the indicated values (horizontal lines) was determined using the two-tailed Student's t-Test, and an asterisk indicates statistically significant values of 0.05 or less.



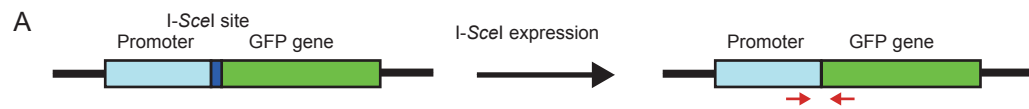

**B: Interstitial 7F1+shATM+Mirin**

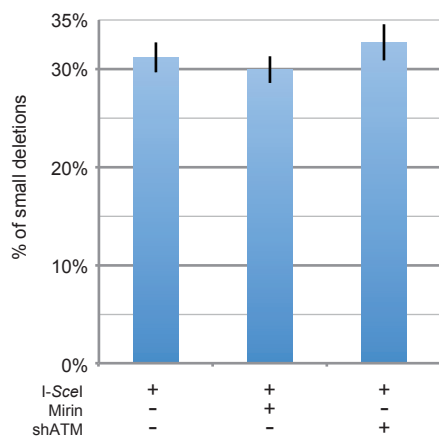

**C: Telomeric 6D1+shATM+Mirin**

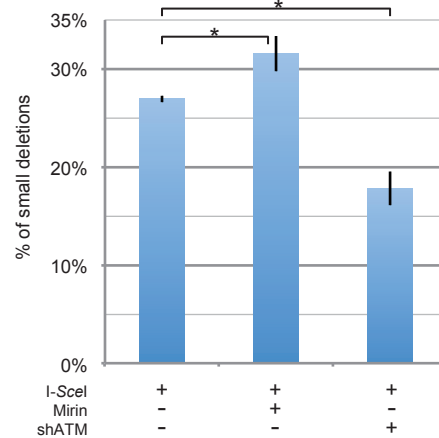

**D: Interstitial 7F1+shMRE11+Mirin**

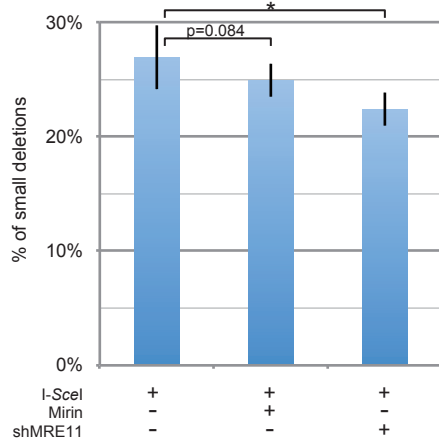

**E: Telomeric 6D1+shMRE11+Mirin**

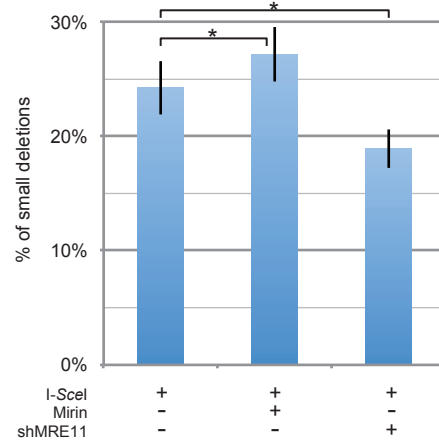

Figure S5

Figure S5. The effect of inhibition of MRE11 and ATM on small deletions at interstitial and subtelomeric DSBs. (A) Cell clones containing the GFP-ISceI plasmid integrated at an interstitial (GFP-7F1) or telomeric (GFP-6D1) site were used for analysis of small deletions. Small deletions were determined by first amplifying a PCR product that spans one of the I-SceI endonuclease recognition sites from genomic DNA isolated from the pooled population of cells expressing I-SceI endonuclease. The PCR product was then digested with I-SceI endonuclease to determine the frequency of cells in the population with small deletions at the I-SceI-induced DSB, as shown by the fraction of PCR product that is not cut with I-SceI endonuclease. The frequency of small deletions at the I-SceI-induced DSB was determined for clone GFP-7F1 (B, D) and clone GFP-6D1 (C, E) following infection with the pQCXIH-ISceI retrovirus vector and selection with hygromycin for 14 days for GFP-7F1 and 15 days for GFP-6D1. Small deletions were analyzed following (B, C) treatment with Mirin or knockdown of ATM (shATM), or (D, E) treatment with Mirin or knockdown of MRE11 (shMRE11). Control cultures for knockdown of ATM or MRE11 were treated with shRNA-mediated knockdown of luciferase, while control cultures for Mirin were treated with DMSO. The values shown in the graph represent the average of more than three independent experiments, each done in triplicate. Error bars represent the standard deviation of more than three separate experiments. Statistical significance for comparisons between the indicated values (horizontal lines) was determined using the two-tailed Student's t-Test, and an asterisk indicates statistically significant values of 0.05 or less.

**Fig. 3B**

|        | 7F2 shLuc/DMSO |          |          | 7F2 shLuc/Mirin |          |          | 7F2 shATM/DMSO |          |          |
|--------|----------------|----------|----------|-----------------|----------|----------|----------------|----------|----------|
|        | total # cells  | # DsRed+ | % DsRed+ | total # cells   | # DsRed+ | % DsRed+ | total # cells  | # DsRed+ | % DsRed+ |
| exp #1 | 829,913        | 30       | 0.00361  | 413,925         | 11       | 0.00265  | 513,981        | 23       | 0.00447  |
|        | 911,991        | 27       | 0.00296  | 554,526         | 12       | 0.00216  | 524,623        | 14       | 0.00266  |
|        | 914,698        | 42       | 0.00459  | 484,916         | 5        | 0.00103  | 660,484        | 19       | 0.00287  |
| exp #2 | 631,169        | 25       | 0.00396  | 642,308         | 2        | 0.00031  | 546,317        | 19       | 0.00347  |
|        | 883,529        | 27       | 0.00305  | 546,051         | 4        | 0.00073  | 535,509        | 14       | 0.00261  |
|        | 832,081        | 28       | 0.00336  | 578,290         | 6        | 0.00103  | 570,152        | 19       | 0.00333  |
| exp #3 | 654,145        | 33       | 0.00504  | 221,828         | 7        | 0.00315  | 168,559        | 13       | 0.00771  |
|        | 589,326        | 31       | 0.00526  | 229,244         | 6        | 0.00261  | 199,369        | 12       | 0.00601  |
|        | 598,854        | 36       | 0.00601  | 300,948         | 2        | 0.00066  | 155,659        | 4        | 0.00256  |
| exp #4 | 315,297        | 18       | 0.00571  | 189,196         | 9        | 0.00475  | 214,456        | 3        | 0.00139  |
|        | 275,678        | 11       | 0.00399  | 123,654         | 2        | 0.00161  | 181,196        | 9        | 0.00496  |
|        | 346,965        | 18       | 0.00518  | 102,028         | 3        | 0.00294  | 277,374        | 12       | 0.00432  |

**Fig.3C**

|        | 6J8 shLuc/DMSO |          |          | 6J8 shLuc/Mirin |          |          | 6J8 shATM/DMSO |          |          |
|--------|----------------|----------|----------|-----------------|----------|----------|----------------|----------|----------|
|        | total # cells  | # DsRed+ | % DsRed+ | total # cells   | # DsRed+ | % DsRed+ | total # cells  | # DsRed+ | % DsRed+ |
| exp #1 | 634,893        | 1127     | 0.17751  | 252,538         | 63       | 0.02494  | 471,925        | 401      | 0.08497  |
|        | 806,078        | 731      | 0.09068  | 246,721         | 132      | 0.0535   | 474,568        | 198      | 0.04172  |
|        | 831,613        | 536      | 0.06445  | 156,173         | 58       | 0.03713  | 457,980        | 115      | 0.02511  |
| exp #2 | 691,486        | 740      | 0.10701  | 557,559         | 408      | 0.07317  | 488,600        | 217      | 0.04441  |
|        | 933,752        | 1036     | 0.11095  | 740,187         | 320      | 0.04323  | 531,041        | 271      | 0.05103  |
|        | 930,751        | 392      | 0.04211  | 664,720         | 158      | 0.02376  | 359,241        | 105      | 0.02922  |
| exp #3 | 913,606        | 480      | 0.05253  | 739,215         | 454      | 0.06141  | 873,032        | 581      | 0.06654  |
|        | 925,503        | 348      | 0.03762  | 810,683         | 442      | 0.05452  | 908,209        | 270      | 0.02972  |
|        | 936,200        | 802      | 0.08566  | 785,678         | 156      | 0.01985  | 900,046        | 170      | 0.01888  |
| exp #4 | 648,129        | 415      | 0.06403  | 134,417         | 21       | 0.01562  | 295,137        | 24       | 0.00813  |
|        | 731,853        | 182      | 0.02486  | 158,685         | 4        | 0.00252  | 344,809        | 29       | 0.00841  |
|        | 717,282        | 242      | 0.03373  | 96,790          | 53       | 0.05475  | 351,735        | 15       | 0.00426  |
| exp #5 | 719,573        | 314      | 0.04363  | 636,824         | 120      | 0.01884  | 822,841        | 172      | 0.02092  |
|        | 895,183        | 253      | 0.02826  | 717,071         | 142      | 0.01981  | 876,839        | 165      | 0.01881  |
|        | 900,243        | 387      | 0.04298  | 774,977         | 165      | 0.02129  |                |          |          |

**Fig.3D**

|        | 7F2 shLuc/DMSO |          |          | 7F2 shLuc/Mirin |          |          | 7F2 shMRE11/DMSO |          |          |
|--------|----------------|----------|----------|-----------------|----------|----------|------------------|----------|----------|
|        | total # cells  | # DsRed+ | % DsRed+ | total # cells   | # DsRed+ | % DsRed+ | total # cells    | # DsRed+ | % DsRed+ |
| exp #1 | 689,919        | 53       | 0.00768  | 125,873         | 3        | 0.00238  | 697,524          | 54       | 0.00774  |
|        | 455,653        | 15       | 0.00329  | 149,939         | 3        | 0.00212  | 459,668          | 29       | 0.00631  |
|        | 744,545        | 43       | 0.00577  | 160,518         | 5        | 0.00311  | 611,046          | 59       | 0.00965  |
| exp #2 | 975,942        | 54       | 0.00553  | 975,121         | 30       | 0.00307  | 970,246          | 78       | 0.00803  |
|        | 921,306        | 71       | 0.00771  | 975,106         | 41       | 0.00421  | 970,931          | 78       | 0.00803  |
|        | 978,577        | 73       | 0.00745  | 977,337         | 35       | 0.00358  | 922,105          | 76       | 0.00824  |
| exp #3 | 706,016        | 30       | 0.00424  | 232,925         | 6        | 0.00257  | 951,798          | 43       | 0.00451  |
|        | 723,774        | 41       | 0.00566  | 187,257         | 4        | 0.00213  | 927,487          | 45       | 0.00485  |
|        | 819,726        | 43       | 0.00524  | 281,859         | 6        | 0.00212  | 971,024          | 69       | 0.00713  |
| exp #4 | 293,530        | 19       | 0.00647  | 38,510          | 2        | 0.00519  | 527,646          | 26       | 0.00492  |
|        | 285,024        | 25       | 0.00877  | 12,182          | 0        | 0        | 423,853          | 20       | 0.00471  |
|        | 243,616        | 14       | 0.00574  | 12,369          | 1        | 0.00808  | 514,290          | 24       | 0.00466  |

**Fig. 3E**

|        | 6J8 shLuc/DMSO |          |          | 6J8 shLuc/Mirin |          |          | 6J8 shMRE11/DMSO |          |          |
|--------|----------------|----------|----------|-----------------|----------|----------|------------------|----------|----------|
|        | total # cells  | # DsRed+ | % DsRed+ | total # cells   | # DsRed+ | % DsRed+ | total # cells    | # DsRed+ | % DsRed+ |
| exp #1 | 893,375        | 680      | 0.07611  | 114,919         | 95       | 0.08266  | 939,549          | 521      | 0.05545  |
|        | 944,112        | 856      | 0.09066  | 121,118         | 49       | 0.04045  | 905,112          | 534      | 0.05899  |
|        | 966,971        | 755      | 0.07807  | 113,711         | 39       | 0.03429  | 844,682          | 527      | 0.06239  |
| exp #2 | 817,123        | 1628     | 0.19923  | 187,300         | 214      | 0.11425  | 820,721          | 286      | 0.03484  |
|        | 344,658        | 257      | 0.07456  | 129,582         | 10       | 0.00771  | 378,869          | 212      | 0.05595  |
|        | 435,619        | 736      | 0.16895  | 156,669         | 151      | 0.09638  | 376,304          | 148      | 0.03932  |
| exp #3 | 310,135        | 296      | 0.09544  | 62,549          | 3        | 0.00479  | 792,814          | 403      | 0.05083  |
|        | 417,347        | 349      | 0.08362  | 62,927          | 31       | 0.04926  | 748,927          | 1116     | 0.14901  |
|        | 414,895        | 274      | 0.06604  | 68,148          | 36       | 0.05281  | 949,080          | 358      | 0.03772  |
| exp #4 | 202,165        | 476      | 0.23545  | 59,279          | 9        | 0.01518  | 348,428          | 74       | 0.02123  |
|        | 257,769        | 187      | 0.07254  | 53,079          | 47       | 0.08854  | 398,496          | 107      | 0.02685  |
|        |                |          |          | 39,521          | 6        | 0.01518  | 377,275          | 206      | 0.05461  |

**Table S1.** Raw data for the frequency of DsRed-positive cells (DsRed+) obtained by FACs analysis of GCRs. The raw data is shown for both clone EDS-7F2 with an interstitial DSB (3B, 3D), and clone EDS-6J8 with a subtelomeric DSB (3C, 3E). Results are shown for cultures (7F2 shLuc/DMSO, 6J8 shLuc/DMSO), cultures treated with Mirin (7F2 shLuc/Mirin, 6J8 shLuc/Mirin), cultures with knockdown of ATM (7F2 shATM/DMSO, 6J8 shATM/DMSO), and cultures with knockdown of MRE11 (7F2 shMRE11/DMSO, 6J8 shMRE11/DMSO). Columns provide numbers for the total number of cells counted (total # cells), the number of DsRed-positive cells (# DsRed+), and the percent of DsRed-positive cells in the population counted (% DsRed+). The values are listed for each of the independent experiments (each done in triplicate) repeated for the figures, (3B) four experiments (exp #1 to #4), (3C) five experiments (exp #1 to #5), (3D) four experiments (exp #1 to #4), and (3E) four experiments (exp #1 to #4).
